# Supplementary material
Source: HighWire-hosted journal article supplement (https://www.cmajopen.ca/highwire/filestream/81097/field_highwire_adjunct_files/1/2016-0164-2-at.pdf)
Supplement: 2016-0164-2-at.pdf [file 2016-0164-2-at.pdf]

**Appendix 2 (as supplied by the authors):** Univariate associations for pre- and post-discharge surgical site infection following Caesarean section

| Risk factor                                                                | No SSI,<br>no. | Pre-discharge SSI |                           | Post-discharge SSI |                           |
|----------------------------------------------------------------------------|----------------|-------------------|---------------------------|--------------------|---------------------------|
|                                                                            |                | No.               | Unadjusted OR<br>(95% CI) | No.                | Unadjusted OR<br>(95% CI) |
| <b>Institution-related</b>                                                 |                |                   |                           |                    |                           |
| Number of Caesarean sections in the delivery hospital, per year (n=33,991) |                |                   |                           |                    |                           |
| <130                                                                       | 8364           | 53                | Reference                 | 109                | Reference                 |
| 130-949                                                                    | 7107           | 126               | 2.80 (2.02-3.88)          | 160                | 1.73 (1.34-2.22)          |
| 950-1249                                                                   | 9133           | 146               | 2.52 (1.83-3.47)          | 175                | 1.47 (1.15-1.88)          |
| ≥1250                                                                      | 8464           | 59                | 1.10 (0.76-1.60)          | 95                 | 0.86 (0.65-1.14)          |
| <b>Area-level</b>                                                          |                |                   |                           |                    |                           |
| Region of maternal residence (n=33,991)                                    |                |                   |                           |                    |                           |
| A                                                                          | 15584          | 172               | Reference                 | 252                | Reference                 |
| B                                                                          | 5880           | 105               | 1.62 (1.26-2.07)          | 112                | 1.18 (0.94-1.48)          |
| C                                                                          | 6135           | 62                | 0.92 (0.68-1.23)          | 101                | 1.02 (0.80-1.29)          |
| D                                                                          | 5469           | 45                | 0.75 (0.53-1.04)          | 74                 | 0.84 (0.64-1.09)          |
| Quintile of neighbourhood-level income (n=33,267)                          |                |                   |                           |                    |                           |
| 1 (lowest)                                                                 | 6441           | 98                | 1.43 (1.13-1.82)          | 164                | 1.92 (1.57-2.35)          |
| 2                                                                          | 5842           | 70                | 1.13 (0.86-1.48)          | 103                | 1.33 (1.06-1.67)          |
| 3-5                                                                        | 20070          | 213               | Reference                 | 266                | Reference                 |
| Maternal residence (n=33,971)                                              |                |                   |                           |                    |                           |
| Urban                                                                      | 22978          | 282               | Reference                 | 373                | Reference                 |
| Rural                                                                      | 10071          | 101               | 0.82 (0.65-1.03)          | 166                | 1.02 (0.84-1.22)          |
| <b>Maternal Demographics</b>                                               |                |                   |                           |                    |                           |
| Maternal age, years (n=33,991)                                             |                |                   |                           |                    |                           |
| <25                                                                        | 6077           | 84                | 1.31 (1.02-1.69)          | 144                | 1.61 (1.31-1.97)          |
| 25-34                                                                      | 20392          | 215               | Reference                 | 301                | Reference                 |
| ≥35                                                                        | 6599           | 85                | 1.22 (0.95-1.58)          | 94                 | 0.97 (0.76-1.22)          |
| Pre-pregnancy weight, kg (n=33,991)                                        |                |                   |                           |                    |                           |

| Risk factor                                                                        | No SSI,<br>no. | Pre-discharge SSI |                           | Post-discharge SSI |                           |
|------------------------------------------------------------------------------------|----------------|-------------------|---------------------------|--------------------|---------------------------|
|                                                                                    |                | No.               | Unadjusted OR<br>(95% CI) | No.                | Unadjusted OR<br>(95% CI) |
| <53                                                                                | 2680           | 28                | 1.09 (0.71-1.66)          | 35                 | 1.22 (0.83-1.79)          |
| 53-66.9                                                                            | 9787           | 94                | Reference                 | 105                | Reference                 |
| 67-76.9                                                                            | 5553           | 51                | 0.96 (0.68-1.35)          | 85                 | 1.43 (1.07-1.90)          |
| 77-86.9                                                                            | 3976           | 46                | 1.20 (0.85-1.72)          | 62                 | 1.45 (1.06-2.00)          |
| 87-97.9                                                                            | 2548           | 37                | 1.51 (1.03-2.22)          | 49                 | 1.79 (1.27-2.53)          |
| ≥98                                                                                | 3043           | 73                | 2.50 (1.83-3.41)          | 114                | 3.49 (2.65-4.59)          |
| Missing                                                                            | 5481           | 55                | 1.04 (0.75-1.46)          | 89                 | 1.51 (1.14-2.01)          |
| <b>Marital status (n=33,991)</b>                                                   |                |                   |                           |                    |                           |
| Married/common-law                                                                 | 24102          | 255               | Reference                 | 332                | Reference                 |
| Single/divorced/separated/widowed                                                  | 7286           | 113               | 1.47 (1.17-1.84)          | 174                | 1.73 (1.44-2.09)          |
| Missing                                                                            | 1680           | 16                | 0.90 (0.54-1.49)          | 33                 | 1.43 (0.99-2.04)          |
| <b>Smoking during pregnancy (n=33,708)</b>                                         |                |                   |                           |                    |                           |
| No                                                                                 | 25820          | 285               | Reference                 | 366                | Reference                 |
| Yes                                                                                | 6973           | 97                | 1.26 (1.00-1.59)          | 167                | 1.69 (1.40-2.03)          |
| <b>Alcohol or drug abuse during pregnancy (n=33,991)</b>                           |                |                   |                           |                    |                           |
| No                                                                                 | 32621          | 374               | Reference                 | 523                | Reference                 |
| Yes                                                                                | 447            | 10                | 1.95 (1.03-3.68)          | 16                 | 2.23 (1.35-3.70)          |
| <b>Maternal medical conditions</b>                                                 |                |                   |                           |                    |                           |
| <b>Non-obstetric pre-existing health conditions affecting pregnancy (n=33,991)</b> |                |                   |                           |                    |                           |
| No                                                                                 | 26761          | 280               | Reference                 | 401                | Reference                 |
| Yes                                                                                | 6307           | 104               | 1.58 (1.25-1.98)          | 138                | 1.46 (1.20-1.78)          |
| <b>Hypertension (n=33,991)</b>                                                     |                |                   |                           |                    |                           |
| No                                                                                 | 28719          | 303               | Reference                 | 435                | Reference                 |
| Pre-existing                                                                       | 515            | 10                | 1.84 (0.97-3.48)          | 13                 | 1.67 (0.95-2.92)          |
| Gestational or unspecified                                                         | 2605           | 43                | 1.56 (1.13-2.16)          | 67                 | 1.70 (1.31-2.20)          |
| Preeclampsia                                                                       | 1229           | 28                | 2.16 (1.44-3.23)          | 24                 | 1.29 (0.85-1.95)          |
| <b>Diabetes (n=33,991)</b>                                                         |                |                   |                           |                    |                           |
| No                                                                                 | 30955          | 341               | Reference                 | 478                | Reference                 |

| Risk factor                                                       | No SSI,<br>no. | Pre-discharge SSI |                           | Post-discharge SSI |                           |
|-------------------------------------------------------------------|----------------|-------------------|---------------------------|--------------------|---------------------------|
|                                                                   |                | No.               | Unadjusted OR<br>(95% CI) | No.                | Unadjusted OR<br>(95% CI) |
| Pre-existing                                                      | 203            | 6                 | 2.68 (1.18-6.10)          | 5                  | 1.60 (0.65-3.89)          |
| Gestational                                                       | 1910           | 37                | 1.76 (1.25-2.48)          | 56                 | 1.90 (1.43-2.52)          |
| <b>Anemia during pregnancy (n=33,991)</b>                         |                |                   |                           |                    |                           |
| No                                                                | 30551          | 352               | Reference                 | 485                | Reference                 |
| Yes                                                               | 2517           | 32                | 1.10 (0.77-1.59)          | 54                 | 1.35 (1.01-1.80)          |
| <b>Depression during pregnancy (n=33,991)</b>                     |                |                   |                           |                    |                           |
| No                                                                | 31592          | 364               | Reference                 | 502                | Reference                 |
| Yes                                                               | 1476           | 20                | 1.18 (0.75-1.85)          | 37                 | 1.58 (1.12-2.23)          |
| <b>Anticoagulation therapy during pregnancy (n=33,991)</b>        |                |                   |                           |                    |                           |
| No                                                                | 32774          | 372               | Reference                 | 528                | Reference                 |
| Yes                                                               | 294            | 12                | 3.60 (1.91-6.76)          | 11                 | 2.32 (1.26-4.27)          |
| <b>Maternal influenza vaccination during pregnancy (n=33,991)</b> |                |                   |                           |                    |                           |
| No                                                                | 32105          | 378               | Reference                 | 523                | Reference                 |
| Yes                                                               | 963            | 6                 | 1.89 (0.84-4.24)          | 16                 | 0.98 (0.59-1.62)          |
| <b>Pregnancy history</b>                                          |                |                   |                           |                    |                           |
| <b>Parity (n=33,991)</b>                                          |                |                   |                           |                    |                           |
| Primiparous                                                       | 16268          | 212               | Reference                 | 333                | Reference                 |
| Multiparous                                                       | 16800          | 172               | 0.79 (0.64-0.96)          | 206                | 0.60 (0.50-0.71)          |
| <b>Mode of delivery in last pregnancy (n=33,991)</b>              |                |                   |                           |                    |                           |
| Not applicable                                                    | 18188          | 228               | Reference                 | 361                | Reference                 |
| Vaginal                                                           | 4187           | 51                | 0.97 (0.72-1.32)          | 60                 | 0.72 (0.55-0.95)          |
| Caesarean section                                                 | 10693          | 105               | 0.78 (0.62-0.99)          | 118                | 0.56 (0.45-0.69)          |
| <b>Number of previous Caesarean sections (n=33,991)</b>           |                |                   |                           |                    |                           |
| None                                                              | 20748          | 264               | Reference                 | 399                | Reference                 |
| One                                                               | 9695           | 95                | 0.77 (0.61-0.97)          | 104                | 0.56 (0.45-0.69)          |
| Two or more                                                       | 2625           | 25                | 0.75 (0.49-1.15)          | 36                 | 0.71 (0.50-1.01)          |
| <b>SSI after previous Caesarean section (n=33,991)</b>            |                |                   |                           |                    |                           |
| No                                                                | 32731          | 378               | Reference                 | 530                | Reference                 |

| Risk factor                                                                       | No SSI,<br>no. | Pre-discharge SSI |                           | Post-discharge SSI |                           |
|-----------------------------------------------------------------------------------|----------------|-------------------|---------------------------|--------------------|---------------------------|
|                                                                                   |                | No.               | Unadjusted OR<br>(95% CI) | No.                | Unadjusted OR<br>(95% CI) |
| Yes                                                                               | 337            | 6                 | 1.54 (0.68-3.47)          | 9                  | 1.65 (0.79-3.43)          |
| <b>Pregnancy characteristics</b>                                                  |                |                   |                           |                    |                           |
| Weight gain during pregnancy, kg (n=33,991)                                       |                |                   |                           |                    |                           |
| <10                                                                               | 5493           | 63                | 1.11 (0.82-1.49)          | 95                 | 1.13 (0.89-1.44)          |
| 10-19.9                                                                           | 13875          | 144               | Reference                 | 212                | Reference                 |
| 20-29.9                                                                           | 4480           | 61                | 1.31 (0.97-1.77)          | 81                 | 1.18 (0.92-1.53)          |
| ≥30                                                                               | 615            | 18                | 2.82 (1.72-4.62)          | 20                 | 2.13 (1.34-3.39)          |
| Missing                                                                           | 8605           | 98                | 1.10 (0.85-1.42)          | 131                | 1.00 (0.80-1.24)          |
| Chorioamnionitis during pregnancy (n=33,991)                                      |                |                   |                           |                    |                           |
| No                                                                                | 32383          | 359               | Reference                 | 508                | Reference                 |
| Yes                                                                               | 685            | 25                | 3.29 (2.18-4.97)          | 31                 | 2.88 (1.99-4.17)          |
| Diagnostic and/or therapeutic procedure(s) performed on mother (n=33,991)         |                |                   |                           |                    |                           |
| No                                                                                | 32112          | 372               | Reference                 | 513                | Reference                 |
| Yes                                                                               | 956            | 12                | 1.08 (0.61-1.93)          | 26                 | 1.70 (1.14-2.53)          |
| Steroid use ≥48 hrs before delivery for fetal lung maturity (n=33,991)            |                |                   |                           |                    |                           |
| None                                                                              | 31919          | 355               | Reference                 | 518                | Reference                 |
| Yes                                                                               | 1149           | 29                | 2.27 (1.53-3.37)          | 21                 | 1.13 (0.72-1.75)          |
| Cervical dilation in the last examination before Caesarean section, cm (n=33,130) |                |                   |                           |                    |                           |
| None                                                                              | 16758          | 167               | Reference                 | 179                | Reference                 |
| 1-3                                                                               | 3371           | 39                | 1.16 (0.82-1.65)          | 74                 | 2.06 (1.56-2.70)          |
| 4-10                                                                              | 12104          | 167               | 1.38 (1.11-1.72)          | 271                | 2.10 (1.73-2.54)          |
| Time between rupture of membranes to delivery, hrs (n=33,690)                     |                |                   |                           |                    |                           |
| <1                                                                                | 16501          | 169               | Reference                 | 201                | Reference                 |
| 2-11                                                                              | 8044           | 103               | 1.25 (0.98-1.60)          | 151                | 1.54 (1.25-1.91)          |
| ≥12                                                                               | 8228           | 111               | 1.32 (1.03-1.68)          | 182                | 1.82 (1.48-2.23)          |
| Stage of labour before Caesarean section (n=33,990)                               |                |                   |                           |                    |                           |
| None                                                                              | 16225          | 160               | Reference                 | 179                | Reference                 |
| First                                                                             | 10478          | 134               | 1.30 (1.03-1.63)          | 220                | 1.90 (1.56-2.33)          |

| Risk factor                                              | No SSI,<br>no. | Pre-discharge SSI |                           | Post-discharge SSI |                           |
|----------------------------------------------------------|----------------|-------------------|---------------------------|--------------------|---------------------------|
|                                                          |                | No.               | Unadjusted OR<br>(95% CI) | No.                | Unadjusted OR<br>(95% CI) |
| Second                                                   | 6364           | 90                | 1.43 (1.10-1.86)          | 140                | 1.99 (1.60-2.49)          |
| Spontaneous rupture of membranes (n=33,646)              |                |                   |                           |                    |                           |
| Yes                                                      | 9116           | 121               | Reference                 | 165                | Reference                 |
| No                                                       | 23614          | 261               | 0.32 (0.67-1.04)          | 369                | 0.86 (0.72-1.04)          |
| <b>Delivery</b>                                          |                |                   |                           |                    |                           |
| Length of antepartum stay, hrs (n=33,969)                |                |                   |                           |                    |                           |
| <24                                                      | 27786          | 289               | Reference                 | 433                | Reference                 |
| 24-49                                                    | 3029           | 44                | 1.40 (1.01-1.93)          | 55                 | 1.17 (0.88-1.55)          |
| ≥50                                                      | 2231           | 51                | 2.20 (1.63-2.97)          | 51                 | 1.47 (1.09-1.97)          |
| Year of delivery (n=33,991)                              |                |                   |                           |                    |                           |
| 1997-2000                                                | 7045           | 176               | 5.08 (3.62-7.13)          | 170                | 1.38 (1.10-1.73)          |
| 2001-2004                                                | 8672           | 102               | 2.39 (1.67-3.43)          | 90                 | 0.60 (0.46-0.78)          |
| 2005-2008                                                | 8806           | 64                | 1.48 (1.00-2.18)*         | 130                | 0.85 (0.67-1.08)          |
| 2009-2012                                                | 8545           | 42                | Reference                 | 149                | Reference                 |
| Delivering on a weekend (n=33,991)                       |                |                   |                           |                    |                           |
| No                                                       | 27441          | 309               | Reference                 | 432                | Reference                 |
| Yes                                                      | 5627           | 75                | 1.18 (0.92-1.52)          | 107                | 1.21 (0.98-1.49)          |
| Primary indication for Caesarean section (n=33,991)      |                |                   |                           |                    |                           |
| Breech                                                   | 4471           | 43                | 1.00 (0.70-1.45)          | 66                 | 1.54 (1.12-2.12)          |
| Dystocia                                                 | 8602           | 128               | 1.55 (1.18-2.03)          | 183                | 2.22 (1.73-2.86)          |
| Fetal distress                                           | 5066           | 63                | 1.30 (0.94-1.79)          | 113                | 2.33 (1.76-3.08)          |
| Other                                                    | 5120           | 56                | 1.14 (0.94-1.79)          | 83                 | 1.69 (1.25-2.29)          |
| Previous Caesarean section                               | 9809           | 94                | Reference                 | 94                 | Reference                 |
| Regional anesthesia during labour or delivery (n=33,991) |                |                   |                           |                    |                           |
| No                                                       | 2100           | 31                | Reference                 | 39                 | Reference                 |
| Yes                                                      | 30968          | 353               | 0.77 (0.53-1.16)          | 500                | 0.87 (0.63-1.21)          |
| Antibiotic therapy during labour and delivery (n=33,991) |                |                   |                           |                    |                           |
| Yes                                                      | 20909          | 190               | Reference                 | 320                | Reference                 |

| Risk factor                                                           | No SSI,<br>no. | Pre-discharge SSI |                           | Post-discharge SSI |                           |
|-----------------------------------------------------------------------|----------------|-------------------|---------------------------|--------------------|---------------------------|
|                                                                       |                | No.               | Unadjusted OR<br>(95% CI) | No.                | Unadjusted OR<br>(95% CI) |
| No                                                                    | 12159          | 194               | 1.76 (1.43-2.15)          | 219                | 1.18 (0.99-1.40)          |
| <b>Maternal blood transfusion (n=33,991)</b>                          |                |                   |                           |                    |                           |
| No                                                                    | 32749          | 373               | Reference                 | 523                | Reference                 |
| Yes                                                                   | 319            | 11                | 3.03 (1.65-5.56)          | 16                 | 3.14 (1.89-5.22)          |
| <b>Season of delivery (n=33,991)</b>                                  |                |                   |                           |                    |                           |
| December-February                                                     | 7474           | 91                | 1.10 (0.82-1.47)          | 110                | 0.85 (0.66-1.09)          |
| March-May                                                             | 8525           | 95                | 1.01 (0.76-1.34)          | 143                | 0.97 (0.77-1.22)          |
| June-August                                                           | 8659           | 96                | Reference                 | 150                | Reference                 |
| September-November                                                    | 8410           | 102               | 1.09 (0.83-1.45)          | 136                | 0.93 (0.74-1.18)          |
| <b>Type of Caesarean section (n=33,991)</b>                           |                |                   |                           |                    |                           |
| Low segment transverse                                                | 32338          | 374               | Reference                 | 528                | Reference                 |
| Other                                                                 | 730            | 10                | 1.18 (0.63-2.23)          | 11                 | 0.92 (0.51-1.69)          |
| <b>Instrumentation used during Caesarean section (n=33,991)</b>       |                |                   |                           |                    |                           |
| No                                                                    | 30492          | 347               | Reference                 | 496                | Reference                 |
| Forceps or vacuum                                                     | 2576           | 37                | 1.26 (0.90-1.77)          | 43                 | 1.03 (0.75-1.40)          |
| <b>General anesthesia during labour or delivery (n=33,991)</b>        |                |                   |                           |                    |                           |
| No                                                                    | 30301          | 344               | Reference                 | 477                | Reference                 |
| Yes                                                                   | 2767           | 40                | 1.27 (0.92-1.77)          | 62                 | 1.42 (1.09-1.85)          |
| <b>Other procedures performed during Caesarean section (n=33,991)</b> |                |                   |                           |                    |                           |
| No                                                                    | 26875          | 312               | Reference                 | 444                | Reference                 |
| Yes                                                                   | 6193           | 72                | 1.00 (0.77-1.29)          | 95                 | 0.93 (0.74-1.16)          |
| <b>Fetal and neonatal</b>                                             |                |                   |                           |                    |                           |
| <b>Infant birth weight, g (n=33,967)</b>                              |                |                   |                           |                    |                           |
| <2,500                                                                | 2235           | 41                | 1.69 (1.21-2.36)          | 31                 | 0.88 (0.61-1.26)          |
| 2500-3900                                                             | 29186          | 317               | Reference                 | 462                | Reference                 |
| ≥4000                                                                 | 1626           | 26                | 1.47 (0.98-2.20)          | 43                 | 1.67 (1.20-2.32)          |
| <b>Apgar score at 5 minutes (n=33,794)</b>                            |                |                   |                           |                    |                           |
| 0-6                                                                   | 619            | 12                | 1.68 (0.94-3.01)          | 21                 | 2.12 (1.36-3.31)          |

| Risk factor                                                              | No SSI,<br>no. | Pre-discharge SSI |                           | Post-discharge SSI |                           |
|--------------------------------------------------------------------------|----------------|-------------------|---------------------------|--------------------|---------------------------|
|                                                                          |                | No.               | Unadjusted OR<br>(95% CI) | No.                | Unadjusted OR<br>(95% CI) |
| 7-10                                                                     | 32256          | 371               | Reference                 | 515                | Reference                 |
| Gestational age, weeks (n=33,873)                                        |                |                   |                           |                    |                           |
| <37                                                                      | 3195           | 64                | 1.96 (1.47-2.62)          | 57                 | 1.31 (0.98-1.75)          |
| 37-39 <sup>+6</sup>                                                      | 18900          | 193               | Reference                 | 257                | Reference                 |
| ≥40                                                                      | 10858          | 125               | 1.13 (0.90-1.41)          | 224                | 1.52 (1.27-1.81)          |
| Breastfeeding at discharge (n=33,677)                                    |                |                   |                           |                    |                           |
| Yes                                                                      | 23129          | 243               | Reference                 | 329                | Reference                 |
| No                                                                       | 9645           | 137               | 1.35 (1.09-1.67)          | 194                | 1.41 (1.18-1.69)          |
| Presentation at delivery (n=33,991)                                      |                |                   |                           |                    |                           |
| Other                                                                    | 8906           | 100               | 0.96 (0.76-1.22)          | 160                | 1.17 (0.97-1.41)          |
| Vertex                                                                   | 22243          | 259               | Reference                 | 342                | Reference                 |
| Missing                                                                  | 1919           | 25                | 1.12 (0.74-1.69)          | 37                 | 1.25 (0.89-1.77)          |
| Number of fetuses (n=33,991)                                             |                |                   |                           |                    |                           |
| Singleton                                                                | 31992          | 357               | Reference                 | 527                | Reference                 |
| Multiples                                                                | 1076           | 27                | 2.25 (1.51-3.34)          | 12                 | 0.68 (0.38-1.20)          |
| Diagnostic and/or therapeutic procedure(s) performed on fetus (n=33,991) |                |                   |                           |                    |                           |
| No                                                                       | 31702          | 366               | Reference                 | 517                | Reference                 |
| Yes                                                                      | 1366           | 18                | 1.14 (0.71-1.83)          | 22                 | 0.99 (0.64-1.52)          |

Note: CI=confidence interval, OR=odds ratio, SSI=surgical site infection

\*95% CI = 1.004-2.18
